# Supplementary material for: Neuroprotection in Glaucoma: Basic Aspects and Clinical Relevance
Source: MDPI journal article supplement (doi:10.3390/jpm12111884), 2022-11-10
Supplement: s1 [file s1]

| Supplementary Table S1. Summary table of the included clinical studies |                                                                                                                                  |                      |               |                                                                                                  |                                                     |                                                   |                                                                                                                    |                                                                                                                  |
|------------------------------------------------------------------------|----------------------------------------------------------------------------------------------------------------------------------|----------------------|---------------|--------------------------------------------------------------------------------------------------|-----------------------------------------------------|---------------------------------------------------|--------------------------------------------------------------------------------------------------------------------|------------------------------------------------------------------------------------------------------------------|
| Modality                                                               | Proposed Mechanism                                                                                                               | Study                | Country       | Study Design                                                                                     | Intervention                                        | Sample Size                                       | Key Findings                                                                                                       | Clinical Implications                                                                                            |
| NGF                                                                    | 1. Promote differentiation, survival, and growth of neurons<br>2. Prevent RGCs and axons from degeneration and inhibit apoptosis | Lambiase et al, 2019 | Italy         | Clinical trial                                                                                   | Topical 200 µg/mL NGF                               | 3 patients with advanced and progressive glaucoma | 1. Improved inner retinal and visual pathway function<br>2. Improved visual field MD, contrast sensitivity, and VA | 1. Topical NGF has the potential in improving visual function in patients with severe glaucoma                   |
|                                                                        |                                                                                                                                  | Beykin et al, 2022   | United States | Prospective, single-center, randomized, double-masked, vehicle-controlled, parallel-group study. | Topical 180 µg/mL recombinant human NGF for 8 weeks | 60 POAG (40 treatment; 20 control)                | 1. No serious adverse effect<br>2. No difference in visual field or RNFL thickness                                 | 1. Topical 180 µg/mL recombinant human NGF is tolerable and safe<br>2. Clinical efficacy remains to be justified |
| BDNF                                                                   | 1. Activation of extracellular signal-regulated kinases 1/2 and c-jun,<br>2. Inhibition of caspase 2                             | Oddone et al, 2017   | Italy         | Observational study                                                                              | NA                                                  | 45 POAG / 15 healthy control                      | 1. Serum levels of BDNF and NGF were lower in the glaucoma group, particularly in early and moderate glaucoma      | 1. Serum levels of BDNF and NGF may serve as biomarkers for the early detection of glaucoma                      |

|      |                                                                                                                                           |                   |        |                                    |                |                                       |                                                                                                                                                                                                               |                                                                                                                                                                            |
|------|-------------------------------------------------------------------------------------------------------------------------------------------|-------------------|--------|------------------------------------|----------------|---------------------------------------|---------------------------------------------------------------------------------------------------------------------------------------------------------------------------------------------------------------|----------------------------------------------------------------------------------------------------------------------------------------------------------------------------|
|      |                                                                                                                                           | Uzel et al, 2018  | Turkey | Prospective, cross-sectional study | Trabeculectomy | 20 POAG / 19 healthy control          | <ol style="list-style-type: none"> <li>1. Pre-operative serum and AH levels of BDNF were lower in the glaucoma groups</li> <li>2. Serum levels of BDNF increased three months after trabeculectomy</li> </ol> | <ol style="list-style-type: none"> <li>1. Reduction of the IOP after trabeculectomy can increase BDNF levels.</li> </ol>                                                   |
|      |                                                                                                                                           | Cha et al, 2021   | Korea  | Prospective, observational study   | NA             | 30 POAG / 30 NTG / 30 healthy control | <ol style="list-style-type: none"> <li>1. Serum and AH levels of BDNF were lower in the glaucoma groups</li> <li>2. Serum BDNF levels were lower in patients with NTG than in those with POAG</li> </ol>      | <ol style="list-style-type: none"> <li>1. Serum levels of BDNF may serve as a biomarker for NTG and POAG</li> </ol>                                                        |
| CNTF | <ol style="list-style-type: none"> <li>1. Promote axonal regeneration</li> <li>2. Stimulate the survival of developing neurons</li> </ol> | Shpak et al, 2017 | Russia | Observational study                | NA             | 55 POAG / 29 healthy control          | <ol style="list-style-type: none"> <li>1. AH and lacrimal fluid levels of CNTF were lower in the glaucoma group.</li> <li>2. The decrease of CNTF levels in</li> </ol>                                        | <ol style="list-style-type: none"> <li>1. Lacrimal fluid and AH levels of CNTF may serve as biomarkers for POAG</li> <li>2. Visual field may be indirectly used</li> </ol> |

|               |                                                                                                      |                      |       |                                                 |                                                                                                                                  |        |                                                                                                                                           |                                                                          |
|---------------|------------------------------------------------------------------------------------------------------|----------------------|-------|-------------------------------------------------|----------------------------------------------------------------------------------------------------------------------------------|--------|-------------------------------------------------------------------------------------------------------------------------------------------|--------------------------------------------------------------------------|
|               |                                                                                                      |                      |       |                                                 |                                                                                                                                  |        | AH and lacrimal fluid were more prominent in severe glaucoma<br>3. AH levels of CNTF correlated with VFI                                  | to estimate AH levels of CNTF                                            |
| Ginkgo Biloba | 1. Increased blood flow<br>2. Reduce oxidative stress in the mitochondria and scavenge free radicals | Quaranta et al, 2003 | Italy | Prospective randomized placebo-controlled study | Oral 40 mg GBE 3 times daily for 4 weeks, followed by 8 weeks of a wash-out, then 4 weeks of placebo tablets; 2 groups crossover | 27 NTG | 1. Improved MD and pattern standard deviation after GBE treatment                                                                         | 1. GBE can improve preexisting visual field defects in patients with NTG |
|               |                                                                                                      | Lee et al, 2013      | Korea | Retrospective study                             | Oral 80 mg GBE 2 times daily for an unknown period                                                                               | 42 NTG | 1. Significant improvement in regression coefficients of MD, PSD, and VFI<br>2. The regression coefficient of mean total deviation change | 1. GBE can slow visual field damage in patients with NTG                 |

|             |                                             |                     |                                |                                                 |                                                                                                                                  |                          |                                                                                                                                                          |                                                                                                                                                    |
|-------------|---------------------------------------------|---------------------|--------------------------------|-------------------------------------------------|----------------------------------------------------------------------------------------------------------------------------------|--------------------------|----------------------------------------------------------------------------------------------------------------------------------------------------------|----------------------------------------------------------------------------------------------------------------------------------------------------|
|             |                                             |                     |                                |                                                 |                                                                                                                                  |                          | increased after the use of GBE                                                                                                                           |                                                                                                                                                    |
|             |                                             | Guo et al, 2014     | China                          | Prospective randomized placebo-controlled study | Oral 40 mg GBE 3 times daily for 4 weeks, followed by 8 weeks of a wash-out, then 4 weeks of placebo tablets; 2 groups crossover | 35 NTG (newly diagnosed) | 1. No significant change in MD and contrast sensitivity                                                                                                  | 1. GBE does not affect visual field or contrast sensitivity in newly-diagnosed NTG patients                                                        |
|             |                                             | Sabaner et al, 2021 | Turkey                         | Prospective study                               | Oral 120 mg GBE once a day for 4 weeks                                                                                           | 60 healthy volunteers    | 1. Significant increase in peripapillary and superior, inferior, temporal quadrant radial peripapillary capillary vascular density after GBE consumption | 1. GBE can lead to vascular morphological changes in the radial peripapillary capillary.<br>2. The functional correlation remains to be justified. |
| Brimonidine | 1. Increase NTFs<br>2. Alter NMDA receptors | Evans et al, 2003   | United States / United Kingdom | Randomized double-blind study                   | Monotherapy with either brimonidine 0.2%                                                                                         | 16 POAG                  | 1. Patients treated with brimonidine had improved                                                                                                        | 1. Brimonidine can improve contrast sensitivity 3                                                                                                  |

|  |                                                                                                         |                    |               |                                        |                                                                                |                                      |                                                                                                                                                                  |                                                                                        |
|--|---------------------------------------------------------------------------------------------------------|--------------------|---------------|----------------------------------------|--------------------------------------------------------------------------------|--------------------------------------|------------------------------------------------------------------------------------------------------------------------------------------------------------------|----------------------------------------------------------------------------------------|
|  | 3. Boost BDNF expression in RGCs<br>4. Interfere with the amyloid- $\beta$ pathway and lower its levels |                    |               |                                        | or timolol gel 0.5%                                                            |                                      | contrast sensitivity<br>2. Similar IOP reduction in both groups                                                                                                  | months after administration                                                            |
|  |                                                                                                         | Tsai et al, 2005   | Taiwan        | Prospective comparative unmasked study | Monotherapy with either brimonidine 0.2% or timolol maleate 0.5% for 12 months | 39 POAG (19 brimonidine; 20 timolol) | 1. RNFL thickness decreased in patients receiving timolol while it remained unchanged in the brimonidine group<br>2. Similar IOP reduction between groups        | 1. Brimonidine may lead to less RNFL change than timolol                               |
|  |                                                                                                         | Krupin et al, 2011 | United States | Randomized controlled study            | Twice-daily monotherapy with either brimonidine or timolol                     | 178 NTG (99 brimonidine; 79 timolol) | 1. Patients treated with brimonidine had less visual field progression by pointwise linear regression<br>2. Mean IOP was identical between 2 groups at all times | 1. Brimonidine may have an effect to slow visual field progression, independent of IOP |

|                         |                                                                                                                                                                              |                    |       |                                                                    |                                                                                           |                                      |                                                                                                                                                                                                                          |                                                                                                                                                                      |
|-------------------------|------------------------------------------------------------------------------------------------------------------------------------------------------------------------------|--------------------|-------|--------------------------------------------------------------------|-------------------------------------------------------------------------------------------|--------------------------------------|--------------------------------------------------------------------------------------------------------------------------------------------------------------------------------------------------------------------------|----------------------------------------------------------------------------------------------------------------------------------------------------------------------|
| Calcium channel blocker | <ol style="list-style-type: none"> <li>prevent RGC death caused by calcium influx</li> <li>Increase local blood flow in ischemic tissues by inducing vasodilation</li> </ol> | Sawada et al, 1996 | Japan | Prospective study                                                  | Brovincamine fumarate 20 mg 3 times daily or placebo 3 times daily for at least 2.5 years | 28 NTG (14 treatment and 14 control) | <ol style="list-style-type: none"> <li>Six out of 14 treated patients showed visual field improvement whereas none of the control group had improvement in the visual field</li> </ol>                                   | <ol style="list-style-type: none"> <li>Brovincamine may have a favorable effect on some NTG patients.</li> </ol>                                                     |
|                         |                                                                                                                                                                              | Koseki et al, 1999 | Japan | Prospective study                                                  | Brovincamine fumarate 20 mg 3 times daily or placebo 3 times daily for 2 years            | 52 NTG                               | <ol style="list-style-type: none"> <li>The slope of change in MD was less negative in the brovincamine group</li> </ol>                                                                                                  | <ol style="list-style-type: none"> <li>Brovincamine may slow visual field progression in NTG patients</li> </ol>                                                     |
|                         |                                                                                                                                                                              | Koseki et al, 2008 | Japan | Randomized, placebo-controlled, double-masked, single-center trial | Oral nilvadipine 2 mg twice daily for 3 years                                             | 33 OAG (17 treatment and 16 control) | <ol style="list-style-type: none"> <li>The slope of change in MD was less negative in the nilvadipine group</li> <li>Quantitative indexes of circulation in the optic disc rim and choroid in the foveal area</li> </ol> | <ol style="list-style-type: none"> <li>Nilvadipine may slow visual field progression and increase blood circulation around the optic disc and foveal area</li> </ol> |

|  |  |                |       |                     |                                    |        |                                                                                                                                                                                                                                                                                                                                                 |                                                                                                                                                                                                                        |
|--|--|----------------|-------|---------------------|------------------------------------|--------|-------------------------------------------------------------------------------------------------------------------------------------------------------------------------------------------------------------------------------------------------------------------------------------------------------------------------------------------------|------------------------------------------------------------------------------------------------------------------------------------------------------------------------------------------------------------------------|
|  |  |                |       |                     |                                    |        | remained increased compared with baseline measurements in the nilvadipine group                                                                                                                                                                                                                                                                 |                                                                                                                                                                                                                        |
|  |  | Hu et al, 2021 | China | Retrospective study | Oral nimodipine 60 mg for 3 months | 20 NTG | <ol style="list-style-type: none"> <li>1. Parafoveal vessel density significantly increased while peripapillary capillary vessel density remained unchanged at 3 months after the use of nimodipine</li> <li>2. The parafoveal vessel density significantly correlated with the administration of nimodipine, RNFL thickness, and MD</li> </ol> | <ol style="list-style-type: none"> <li>1. Nimodipine can lead to vascular morphological changes in the macula, which correlated positively with structural and functional parameters in glaucoma evaluation</li> </ol> |

|            |                                                                                           |                     |               |                                                                                  |                                                                                     |                                       |                                                                                                                                                                                                                                                                              |                                                                                                                                                                            |
|------------|-------------------------------------------------------------------------------------------|---------------------|---------------|----------------------------------------------------------------------------------|-------------------------------------------------------------------------------------|---------------------------------------|------------------------------------------------------------------------------------------------------------------------------------------------------------------------------------------------------------------------------------------------------------------------------|----------------------------------------------------------------------------------------------------------------------------------------------------------------------------|
|            |                                                                                           | Duan et al, 2022    | China         | Retrospective study                                                              | Combined therapy with nimodipine plus latanoprost versus monotherapy of latanoprost | 87 POAG (46 combined; 41 monotherapy) | <ol style="list-style-type: none"> <li>1. Ocular hemodynamics, visual field defects, 24-hour peak IOP, binocular optic disc parameters, and life quality were better in the combined treatment group.</li> <li>2. No difference in adverse effects between groups</li> </ol> | <ol style="list-style-type: none"> <li>1. Nimodipine combined with latanoprost is effective and safe in treating POAG patients</li> </ol>                                  |
| Memantine  | <ol style="list-style-type: none"> <li>1. Inhibit excessive glutamate activity</li> </ol> | Weinreb et al, 2018 | United States | Randomized, double-masked, placebo-controlled, parallel-group, multicenter study | Memantine 20 mg, memantine 10 mg, or placebo for 48 months                          | 2298 OAG                              | <ol style="list-style-type: none"> <li>1. Treatment with memantine 10 mg and 20 mg did not affect retarding visual field progression</li> </ol>                                                                                                                              | <ol style="list-style-type: none"> <li>1. Daily treatment with oral memantine 10 mg or 20 mg for 48 months is not effective to prevent visual field progression</li> </ol> |
| Citicoline | <ol style="list-style-type: none"> <li>1. Reduce glutamate excitotoxicity,</li> </ol>     | Parisi et al, 1999  | Italy         | Randomized study                                                                 | Citicoline 1000 mg/day intramuscularly                                              | 40 OAG (25 treatment; 15 control)     | <ol style="list-style-type: none"> <li>1. Treatment with citicoline leads to improvement of</li> </ol>                                                                                                                                                                       | <ol style="list-style-type: none"> <li>1. Intramuscular injection of citicoline may improve retinal</li> </ol>                                                             |



|  |                                                                                |                       |       |                                                                  |                                                                         |                                         |                                                                                                                                                                                       |                                                                                      |
|--|--------------------------------------------------------------------------------|-----------------------|-------|------------------------------------------------------------------|-------------------------------------------------------------------------|-----------------------------------------|---------------------------------------------------------------------------------------------------------------------------------------------------------------------------------------|--------------------------------------------------------------------------------------|
|  | 2. Lower oxidative stress in RGC damage<br>3. Improve axonal transport deficit |                       |       |                                                                  |                                                                         |                                         | VEP and PERG parameters                                                                                                                                                               | and visual pathway function                                                          |
|  |                                                                                | Ottobelli et al, 2013 | Italy | Prospective study                                                | Citicoline in oral solution for 2 years                                 | 41 POAG                                 | 1. The rate of visual field progression decreased significantly after the treatment                                                                                                   | 1. Oral solution of citicoline may slow glaucoma progression                         |
|  |                                                                                | Parisi et al, 2015    | Italy | Prospective randomized masked study                              | Topical citicoline (OMK1) 3 times daily versus beta-blocker monotherapy | 47 OAG (24 citicoline; 23 beta-blocker) | 1. Increasing PERG P50-N95 and VEP N75-P100 amplitudes, and shortening of VEP P100 implicit times after topical citicoline<br>2. No changes in PERG and VEP in the beta-blocker group | 1. Topical citicoline can induce enhancement in retinal and visual cortical function |
|  |                                                                                | Rossetti et al, 2020  | Italy | Randomized, double-masked, placebo-controlled, multicenter study | Topical citicoline 3 times daily for 3 years                            | 80 OAG (40 citicoline; 40 control)      | 1. Better rates of progression for 10-2 MD in the treated group                                                                                                                       | 1. Citicoline may prevent functional and structural progression in                   |

|                 |                                                             |                    |        |                              |                                                                                                     |                                                                                           |                                                                                                                                                |                                                                                       |
|-----------------|-------------------------------------------------------------|--------------------|--------|------------------------------|-----------------------------------------------------------------------------------------------------|-------------------------------------------------------------------------------------------|------------------------------------------------------------------------------------------------------------------------------------------------|---------------------------------------------------------------------------------------|
|                 |                                                             |                    |        |                              |                                                                                                     |                                                                                           | 2. Less loss of RNFL in the treated group                                                                                                      | patients with controlled IOP                                                          |
| Antioxidant Q10 | 1. Delay RGC apoptosis<br>2. Reduce glutamate concentration | Parisi et al, 2014 | Italy  | Retrospective study          | Coqun (coenzyme Q10 and vitamin E, 2 drops daily) plus beta-blocker versus beta-blocker monotherapy | 43 OAG (22 combined; 21 beta-blocker monotherapy)                                         | 1. PERG P50 and VEP P100 implicit times were decreased, whereas PERG P50-N95 and VEP N75-P100 amplitudes were increased                        | 1. The addition of Coqun can improve retinal and visual cortical function             |
|                 |                                                             | Ozates et al, 2019 | Turkey | Prospective randomized study | Coqun (coenzyme Q10 and vitamin E, 2 drops daily) for 1 month                                       | 47 pseudo-exfoliative glaucoma (23 treatment; 24 control), 17 pseudo-exfoliation syndrome | 1. Mean AH superoxide dismutase level was lower in the pseudo-exfoliative glaucoma + Coqun group than in the pseudo-exfoliative glaucoma group | 1. Topical Coqun may decrease superoxide dismutase, an oxidative stress marker, in AH |

|                              |                                                                       |                       |               |                                                    |                                                                                                                   |                                                        |                                                                                                                                                                                                                                  |                                                                                             |
|------------------------------|-----------------------------------------------------------------------|-----------------------|---------------|----------------------------------------------------|-------------------------------------------------------------------------------------------------------------------|--------------------------------------------------------|----------------------------------------------------------------------------------------------------------------------------------------------------------------------------------------------------------------------------------|---------------------------------------------------------------------------------------------|
| Nicotinamide<br>(vitamin B3) | 1. prevents age-related declines in nicotinamide adenine dinucleotide | Nzougnet et al, 2019  | France        | Observational study                                | NA                                                                                                                | 34 POAG / 30 control                                   | 1. Plasma level of nicotinamide was lower in POAG patients                                                                                                                                                                       | 1. Glaucoma is associated with lower plasma levels of nicotinamide                          |
|                              |                                                                       | Hui et al, 2020       | Australia     | Randomized, double-masked, crossover study         | nicotinamide 1.5 g/day for 6 weeks, then 3.0 g/day for 6 weeks followed by crossover with placebo without washout | 49 glaucoma (26 nicotinamide first; 23 placebos first) | 1. Saturated photopic negative response amplitude improved more following the consumption of nicotinamide<br>2. Improvement of visual field MD $\geq 1$ dB and less deterioration were observed following nicotinamide treatment | 1. Oral nicotinamide can lead to improvement in inner retinal function in glaucoma patients |
|                              |                                                                       | De Moraes et al, 2022 | United States | Randomized, double-blind, placebo-controlled study | Increasing oral doses of nicotinamide (1000 to 3000 mg) and pyruvate                                              | 32 OAG (21 treatments; 11 placebos)                    | 1. A greater number of improving visual field test locations and improved rates of                                                                                                                                               | 1. High doses of nicotinamide supplementation can lead to short-term                        |

|         |                                                                                                 |                       |               |                            |                                                           |                                                                                         |                                                                                                                                                                                                             |                                                                                                                                                                      |
|---------|-------------------------------------------------------------------------------------------------|-----------------------|---------------|----------------------------|-----------------------------------------------------------|-----------------------------------------------------------------------------------------|-------------------------------------------------------------------------------------------------------------------------------------------------------------------------------------------------------------|----------------------------------------------------------------------------------------------------------------------------------------------------------------------|
|         |                                                                                                 |                       |               |                            | (1500 to 3000 mg)<br>versus placebo                       |                                                                                         | change of PSD in<br>the treated group                                                                                                                                                                       | improvement in<br>visual field<br>function                                                                                                                           |
| Statins | 1. Improve survival of RGC<br>2. Reduce apoptosis<br>3. Suppress glial activation in the retina | De Castro et al, 2007 | United States | Retrospective cohort study | Statins only, aspirin only, statins plus aspirin, control | 76 OAG suspect (12 statins only; 13 aspirin only; 12 statins plus aspirin; 39 control ) | 1. Statins only group exhibited slower progression of rim volume, RNFL cross-sectional area, and mean global RNFL thickness than the control                                                                | 1. Statins may be associated with optic nerve structural parameters in glaucoma suspects                                                                             |
|         |                                                                                                 | Kang et al, 2022      | United States | Retrospective cohort study | History of statins use                                    | 1978 POAG and glaucoma suspect (775 subjects had statins use)                           | 1. Similar rates of change for MD and RNFL thickness between the two groups<br>2. Multivariable models revealed no association between the duration of statins use and rates of MD or RNFL thickness change | 1. History of statins use or duration of statins use is not associated with structural or functional parameter changes in patients with glaucoma or glaucoma suspect |

|                   |                                                                                                                                                                                             |                    |        |                |                                                                      |                         |                                                                                                                                                                                                                                    |                                                                                                                                                                                                                                                   |
|-------------------|---------------------------------------------------------------------------------------------------------------------------------------------------------------------------------------------|--------------------|--------|----------------|----------------------------------------------------------------------|-------------------------|------------------------------------------------------------------------------------------------------------------------------------------------------------------------------------------------------------------------------------|---------------------------------------------------------------------------------------------------------------------------------------------------------------------------------------------------------------------------------------------------|
| Stem cell therapy | <ol style="list-style-type: none"> <li>1. Regenerate RGCs and produce new cells of different kinds.</li> <li>2. Provide a favorable neurotrophic environment to the damaged RGCs</li> </ol> | Vivela et al, 2021 | Brazil | Clinical trial | A single intravitreal injection of autologous mesenchymal stem cells | 2 OAG in advanced stage | <ol style="list-style-type: none"> <li>1. No improvement in VA or visual field sensitivities</li> <li>2. ERG was stable for 1 year in one case and 2 weeks in another case due to the development of retinal detachment</li> </ol> | <ol style="list-style-type: none"> <li>1. Mesenchymal stem cell therapy seems to be capable of maintaining ERG in severe glaucoma cases</li> <li>2. The risk of severe adverse effects warrants further investigation and modification</li> </ol> |
|-------------------|---------------------------------------------------------------------------------------------------------------------------------------------------------------------------------------------|--------------------|--------|----------------|----------------------------------------------------------------------|-------------------------|------------------------------------------------------------------------------------------------------------------------------------------------------------------------------------------------------------------------------------|---------------------------------------------------------------------------------------------------------------------------------------------------------------------------------------------------------------------------------------------------|

AH, aqueous humor; BDNF, brain-derived neurotrophic factor; CNTF, ciliary neurotrophic factor; GBE, ginkgo biloba; IOP, intraocular pressure; MD, mean deviation; NA, not available; NGF, nerve growth factor; NMDA, N-methyl-D-aspartate; NTG, normal tension glaucoma; NTFs, neurotrophic factors; PERG, pattern electroretinogram; POAG, primary open-angle glaucoma; PSD, pattern standard deviation; RGCs, retinal ganglion cells; RNFL, retinal nerve fiber layer; VA, visual acuity; VEP, visual evoked potential; VFI, visual field index
